# Supplementary material for: Clinicopathological discrepancies in the diagnoses of childhood causes of death in the CHAMPS network: An analysis of antemortem diagnostic inaccuracies
Source: PubMed Central journal article supplement (PMC11409330; doi:10.1136/bmjpo-2024-002654), 2024-07-20
Supplement: bmjpo-8-1-s001.pdf [file bmjpo-8-1-s001.pdf]

**Supplemental Figure 1.** Description of included cases of mortality among infants and children aged 1-59 months who died in one of seven sites in the Child Health and Mortality Prevention Surveillance Network

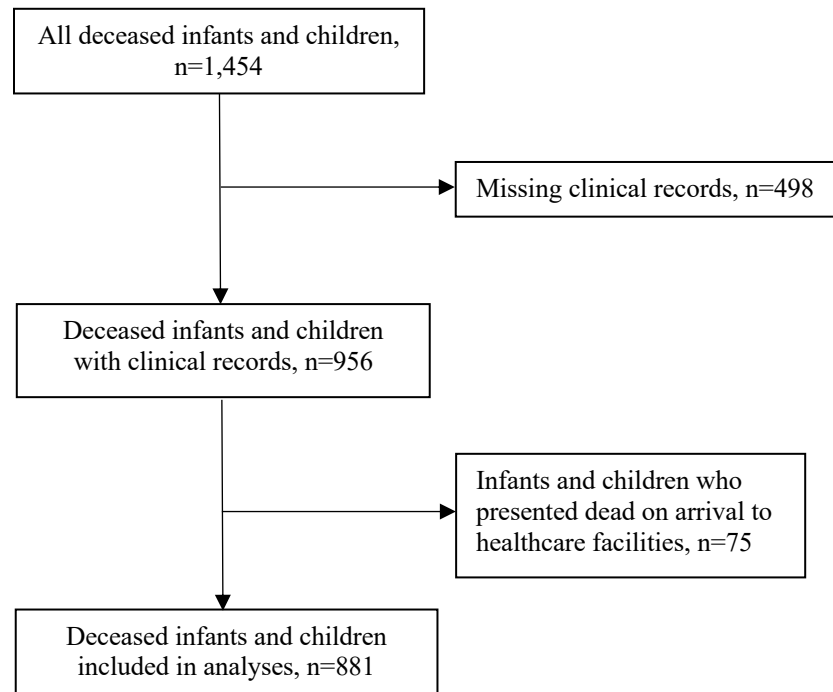

**Supplemental Table 1.** Comparison of included population (N=881) to those deaths in healthcare facilities with missing clinical records (N=498) who died from 2016-2022.

|                                                                      | Included in Analyses, n (%) | Excluded due to missing clinical records, n (%) | P value |
|----------------------------------------------------------------------|-----------------------------|-------------------------------------------------|---------|
| <b>Age in months (median, IQR)*</b>                                  | 11 (4, 21)                  | 11 (4, 24)                                      | 0.856   |
| <b>Female</b>                                                        | 417 (47.3)                  | 220 (44.2)                                      | 0.261   |
| <b>Site</b>                                                          |                             |                                                 |         |
| Bangladesh                                                           | 29 (3.3)                    | 43 (8.6)                                        | <0.001  |
| Ethiopia                                                             | 22 (2.5)                    | 69 (13.9)                                       | <0.001  |
| Kenya                                                                | 228 (25.9)                  | 50 (10.0)                                       | <0.001  |
| Mali                                                                 | 135 (15.3)                  | 100 (20.1)                                      | 0.025   |
| Mozambique                                                           | 88 (10.0)                   | 184 (36.9)                                      | <0.001  |
| Sierra Leone                                                         | 215 (24.4)                  | 37 (7.4)                                        | <0.001  |
| South Africa                                                         | 164 (18.6)                  | 15 (3.0)                                        | <0.001  |
| <b>Most Common Causes of Death Anywhere in Causal Chain of Death</b> |                             |                                                 |         |
| Lower respiratory tract infections                                   | 274 (31.1)                  | 53 (10.6)                                       | <0.001  |
| Sepsis                                                               | 258 (29.3)                  | 35 (7.0)                                        | <0.001  |
| Malnutrition                                                         | 167 (19.0)                  | 27 (5.4)                                        | <0.001  |
| Malaria                                                              | 142 (16.1)                  | 12 (2.4)                                        | <0.001  |
| Diarrheal diseases                                                   | 90 (10.2)                   | 19 (3.8)                                        | <0.001  |
| HIV                                                                  | 68 (7.7)                    | 8 (1.6)                                         | <0.001  |
| Congenital birth defects                                             | 63 (7.2)                    | 6 (1.2)                                         | <0.001  |
| Anemias                                                              | 93 (10.6)                   | 2 (0.4)                                         | <0.001  |
| Other respiratory disease                                            | 50 (5.7)                    | 4 (0.8)                                         | <0.001  |
| Meningitis/encephalitis                                              | 49 (5.6)                    | 9 (1.8)                                         | 0.001   |

\*Two cases had missing age but were categorized as infants or children at the time of death. P-values from Fisher's exact test and Kruskal-Wallis test.

**Supplemental Table 2.** Causes of death and location in causal chain among infants and children aged 1-59 months who died from 2016 to 2022

| <b>Immediate Causes of Death Determined Postmortem</b>       | <b>n (%)</b> |
|--------------------------------------------------------------|--------------|
| Sepsis                                                       | 189 (21.5)   |
| Lower respiratory infections                                 | 125 (14.2)   |
| Malaria                                                      | 49 (5.6)     |
| Diarrheal diseases                                           | 30 (3.4)     |
| Other respiratory disease                                    | 29 (3.3)     |
| Anemias                                                      | 29 (3.3)     |
| Meningitis                                                   | 13 (1.5)     |
| Other infections                                             | 13 (1.5)     |
| Liver disease                                                | 4 (0.5)      |
| Other disorders of fluid, electrolyte, and acid-base balance | 2 (0.2)      |
| Poisoning                                                    | 3 (0.3)      |
| <b>Underlying Causes of Death Determined Postmortem</b>      |              |
| Malnutrition                                                 | 119 (13.5)   |
| Malaria                                                      | 77 (8.7)     |
| HIV                                                          | 68 (7.7)     |
| Lower respiratory infections                                 | 51 (5.8)     |
| Congenital birth defects                                     | 58 (6.6)     |
| Diarrheal disease                                            | 45 (5.1)     |
| Sepsis                                                       | 33 (3.7)     |
| Neonatal preterm birth complications                         | 33 (3.7)     |
| Injury                                                       | 23 (2.6)     |
| Other infections                                             | 12 (1.4)     |
| <b>Comorbid Causes of Death Determined Postmortem</b>        |              |
| Lower respiratory infections                                 | 110 (12.5)   |
| Sepsis                                                       | 58 (6.6)     |
| Anemias                                                      | 63 (7.2)     |
| Malnutrition                                                 | 47 (5.3)     |
| Meningitis/encephalitis                                      | 34 (3.9)     |
| Malaria                                                      | 35 (4.0)     |
| Diarrheal diseases                                           | 25 (2.8)     |
| Other respiratory diseases                                   | 15 (1.7)     |
| Other infections                                             | 21 (2.4)     |

**Supplemental Table 3.** Distribution of the antemortem clinical diagnoses and postmortem causes of death for N=881 deceased infants and children aged 1-59 months enrolled in CHAMPS sites from 2016 to 2022.

| Clinical diagnoses                      | Postmortem Determined Cause of Death Anywhere in the Causal Chain of Death |               |                     |                |                           |            |                                 |                |                                   |                                |
|-----------------------------------------|----------------------------------------------------------------------------|---------------|---------------------|----------------|---------------------------|------------|---------------------------------|----------------|-----------------------------------|--------------------------------|
|                                         | Lower respiratory tract infections, n (%)                                  | Sepsis, n (%) | Malnutrition, n (%) | Malaria, n (%) | Diarrheal diseases, n (%) | HIV, n (%) | Congenital birth defects, n (%) | Anemias, n (%) | Other respiratory diseases, n (%) | Meningitis/encephalitis, n (%) |
|                                         | N=274                                                                      | N=258         | N=167               | N=142          | N=90                      | N=68       | N=63                            | N=93           | N=50                              | N=49                           |
| Lower respiratory tract infection       | 130 (47.4)                                                                 | 72 (27.9)     | 53 (31.7)           | 28 (19.7)      | 20 (22.2)                 | 31 (45.6)  | 30 (47.6)                       | 25 (26.9)      | 22 (44.0)                         | 13 (26.5)                      |
| Sepsis                                  | 84 (30.7)                                                                  | 96 (37.2)     | 26 (15.6)           | 9 (6.3)        | 15 (16.7)                 | 17 (25.0)  | 26 (41.3)                       | 10 (10.8)      | 12 (24.0)                         | 21 (42.9)                      |
| Malnutrition                            | 83 (30.3)                                                                  | 78 (30.2)     | 77 (46.1)           | 32 (22.5)      | 30 (33.3)                 | 38 (55.9)  | 12 (19.0)                       | 24 (25.8)      | 9 (18.0)                          | 13 (26.5)                      |
| Malaria                                 | 53 (19.3)                                                                  | 45 (17.4)     | 64 (38.3)           | 114 (80.3)     | 23 (25.6)                 | 17 (25.0)  | 6 (9.5)                         | 64 (68.8)      | 14 (28.0)                         | 2 (4.1)                        |
| Diarrheal diseases                      | 90 (32.8)                                                                  | 88 (34.1)     | 65 (38.9)           | 38 (26.8)      | 74 (82.2)                 | 27 (39.7)  | 11 (17.5)                       | 24 (25.8)      | 17 (34.0)                         | 7 (14.3)                       |
| HIV                                     | 36 (13.1)                                                                  | 20 (7.8)      | 6 (3.6)             | 11 (7.7)       | 7 (7.8)                   | 45 (66.2)  | 0 (0)                           | 5 (5.4)        | 4 (8.0)                           | 4 (8.2)                        |
| Congenital birth defects                | 30 (10.9)                                                                  | 22 (8.5)      | 7 (4.2)             | 1 (0.7)        | 1 (1.1)                   | 2 (2.9)    | 35 (55.6)                       | 0 (0)          | 8 (16.0)                          | 8 (16.3)                       |
| Anemias                                 | 48 (17.5)                                                                  | 53 (20.5)     | 36 (21.6)           | 37 (26.1)      | 14 (15.6)                 | 19 (27.9)  | 6 (9.5)                         | 34 (36.6)      | 10 (20.0)                         | 8 (16.3)                       |
| Other respiratory diseases <sup>1</sup> | 19 (6.9)                                                                   | 19 (7.4)      | 4 (2.4)             | 5 (3.5)        | 4 (4.4)                   | 4 (5.9)    | 12 (19.0)                       | 4 (4.3)        | 13 (26.0)                         | 4 (8.2)                        |
| Meningitis/encephalitis                 | 29 (10.6)                                                                  | 25 (9.7)      | 5 (3.0)             | 3 (2.1)        | 2 (2.2)                   | 5 (7.4)    | 9 (14.3)                        | 4 (4.3)        | 6 (12.0)                          | 14 (28.6)                      |

<sup>1</sup>Includes aspiration pneumonia, interstitial lung disease, and pulmonary hemorrhage

**Supplemental Table 4.** Performance of clinician antemortem diagnosis compared with postmortem causes of death among infants and children aged 1-59 months enrolled in CHAMPS sites from 2016 to 2022.

| Postmortem Determined Cause of Death | Positive likelihood ratio (95% CI) | Negative likelihood ratio (95% CI) | Diagnostic odds ratio (95% CI) | Correctly classified proportion (95% CI) | Apparent prevalence (95% CI) | True prevalence (95% CI) | Youden's index (95% CI) | Number needed to diagnose (95% CI) |
|--------------------------------------|------------------------------------|------------------------------------|--------------------------------|------------------------------------------|------------------------------|--------------------------|-------------------------|------------------------------------|
| Lower respiratory tract infections   | 2.04 (1.69, 2.47)                  | 0.68 (0.61, 0.77)                  | 2.98 (2.20, 4.04)              | 0.677 (0.644, 0.707)                     | 0.308 (0.277, 0.339)         | 0.311 (0.281, 0.343)     | 0.242 (0.146, 0.336)    | 4.1 (3.0, 6.8)                     |
| Sepsis                               | 3.68 (2.77, 4.88)                  | 0.70 (0.63, 0.77)                  | 5.27 (3.67, 7.57)              | 0.745 (0.714, 0.773)                     | 0.180 (0.156, 0.207)         | 0.293 (0.263, 0.324)     | 0.271 (0.185, 0.356)    | 3.7 (2.8, 5.4)                     |
| Malnutrition                         | 2.70 (2.14, 3.40)                  | 0.65 (0.56, 0.75)                  | 4.15 (2.89, 5.96)              | 0.759 (0.730, 0.787)                     | 0.226 (0.199, 0.255)         | 0.190 (0.164, 0.217)     | 0.290 (0.183, 0.396)    | 3.4 (2.5, 5.5)                     |
| Malaria                              | 3.55 (3.04, 4.15)                  | 0.25 (0.18, 0.36)                  | 13.95 (8.91, 21.82)            | 0.779 (0.750, 0.806)                     | 0.319 (0.288, 0.351)         | 0.161 (0.137, 0.187)     | 0.577 (0.470, 0.668)    | 1.7 (1.5, 2.1)                     |
| Diarrheal diseases                   | 3.32 (2.84, 3.87)                  | 0.24 (0.15, 0.37)                  | 14.04 (7.99, 24.68)            | 0.759 (0.730, 0.787)                     | 0.306 (0.276, 0.338)         | 0.102 (0.083, 0.124)     | 0.574 (0.448, 0.677)    | 1.7 (1.5, 2.2)                     |
| HIV                                  | 67.25 (33.06, 136.81)              | 0.34 (0.24, 0.48)                  | 196.88 (83.42, 464.64)         | 0.965 (0.950, 0.976)                     | 0.060 (0.045, 0.078)         | 0.077 (0.060, 0.097)     | 0.652 (0.518, 0.768)    | 1.5 (1.3, 1.9)                     |
| Congenital birth defects             | 9.88 (6.91, 14.12)                 | 0.47 (0.36, 0.62)                  | 20.98 (11.76, 37.44)           | 0.916 (0.896, 0.933)                     | 0.092 (0.074, 0.113)         | 0.072 (0.055, 0.091)     | 0.499 (0.351, 0.639)    | 2.0 (1.6, 2.9)                     |
| Anemias                              | 2.12 (1.56, 2.88)                  | 0.77 (0.65, 0.90)                  | 2.76 (1.74, 4.38)              | 0.779 (0.750, 0.806)                     | 0.193 (0.167, 0.221)         | 0.106 (0.086, 0.128)     | 0.193 (0.067, 0.325)    | 5.2 (3.1, 14.9)                    |
| Other respiratory diseases*          | 6.35 (3.59, 11.26)                 | 0.77 (0.65, 0.91)                  | 8.24 (4.01, 16.91)             | 0.919 (0.899, 0.937)                     | 0.053 (0.039, 0.070)         | 0.057 (0.042, 0.074)     | 0.219 (0.090, 0.375)    | 4.6 (2.7, 11.2)                    |
| Meningitis/encephalitis              | 4.40 (2.64, 7.35)                  | 0.76 (0.64, 0.91)                  | 5.76 (2.92, 11.36)             | 0.899 (0.877, 0.918)                     | 0.077 (0.060, 0.097)         | 0.056 (0.041, 0.073)     | 0.221 (0.082, 0.383)    | 4.5 (2.6, 12.2)                    |

\*Includes aspiration pneumonia, interstitial lung disease, and pulmonary hemorrhage

**Supplemental Table 5.** Comparison of clinician antemortem diagnosis and postmortem causes of death among infants and children aged 1-59 months who died from 2016 to 2022 by CHAMPS site

| Disease                            | True Positive, n (%) | True Negative, n (%) | False Positive, n (%) | False Negative, n (%) | Sensitivity % (95% CI) | Specificity % (95% CI) | Positive Predictive Value % (95% CI) | Negative Predictive Value % (95% CI) |
|------------------------------------|----------------------|----------------------|-----------------------|-----------------------|------------------------|------------------------|--------------------------------------|--------------------------------------|
| Bangladesh, N=29                   |                      |                      |                       |                       |                        |                        |                                      |                                      |
| Lower respiratory tract infections | 0 (0)                | 21 (72.4)            | 7 (24.1)              | 1 (3.4)               | 0.0 (0.0, 97.5)        | 75.0 (55.1, 89.3)      | 0.0 (0.0, 41.0)                      | 95.5 (77.2, 99.9)                    |
| Sepsis                             | 2 (6.9)              | 25 (86.2)            | 1 (3.4)               | 1 (3.4)               | 66.7 (9.4, 99.2)       | 96.2 (80.4, 99.9)      | 66.7 (9.4, 99.2)                     | 96.2 (80.4, 99.9)                    |
| Malnutrition                       | 1 (3.4)              | 28 (96.6)            | 0 (0)                 | 0 (0)                 | 100.0 (2.5, 100.0)     | 100.0 (87.7, 100.0)    | 100.0 (2.5, 100.0)                   | 100.0 (87.7, 100.0)                  |
| Malaria                            | 0 (0)                | 29 (100.0)           | 0 (0)                 | 0 (0)                 | --                     | 100.0 (88.1, 100.0)    | --                                   | 100.0 (88.1, 100.0)                  |
| Diarrheal diseases                 | 1 (3.4)              | 27 (93.1)            | 1 (3.4)               | 0 (0)                 | 100.0 (2.5, 100.0)     | 96.4 (81.7, 99.9)      | 50.0 (1.3, 98.7)                     | 100.0 (87.2, 100.0)                  |
| HIV                                | 0 (0)                | 29 (100.0)           | 0 (0)                 | 0 (0)                 | --                     | 100.0 (88.1, 100.0)    | --                                   | 100.0 (88.1, 100.0)                  |
| Congenital birth defects           | 0 (0)                | 15 (51.7)            | 13 (44.8)             | 1 (3.4)               | 0.0 (0.0, 97.5)        | 53.6 (33.9, 72.5)      | 0.0 (0.0, 24.7)                      | 93.8 (69.8, 99.8)                    |
| Anemias                            | 0 (0)                | 26 (89.7)            | 2 (6.9)               | 1 (3.4)               | 0.0 (0.0, 97.5)        | 92.9 (76.5, 99.1)      | 0.0 (0.0, 84.2)                      | 96.3 (81.0, 99.9)                    |
| Other respiratory disease*         | 0 (0)                | 29 (100.0)           | 0 (0)                 | 0 (0)                 | --                     | 100.0 (88.1, 100.0)    | --                                   | 100.0 (88.1, 100.0)                  |
| Meningitis/encephalitis            | 0 (0)                | 29 (100.0)           | 0 (0)                 | 0 (0)                 | --                     | 100.0 (88.1, 100.0)    | --                                   | 100.0 (88.1, 100.0)                  |
| Ethiopia, N=22                     |                      |                      |                       |                       |                        |                        |                                      |                                      |
| Lower respiratory tract infection  | 4 (18.2)             | 13 (59.1)            | 2 (9.1)               | 3 (13.6)              | 57.1 (18.4, 90.1)      | 86.7 (59.5, 98.3)      | 66.7 (22.3, 95.7)                    | 81.2 (54.4, 96.0)                    |
| Sepsis                             | 2 (9.1)              | 11 (50.0)            | 1 (4.5)               | 8 (36.4)              | 20.0 (2.5, 55.6)       | 91.7 (61.5, 99.8)      | 66.7 (9.4, 99.2)                     | 57.9 (33.5, 79.7)                    |
| Malnutrition                       | 8 (36.4)             | 7 (31.8)             | 4 (18.2)              | 3 (13.6)              | 72.7 (39.0, 94.0)      | 63.6 (30.8, 89.1)      | 66.7 (34.9, 90.1)                    | 70.0 (34.8, 93.3)                    |
| Malaria                            | 0 (0)                | 22 (100.0)           | 0 (0)                 | 0 (0)                 | --                     | 100.0 (84.6, 100.0)    | --                                   | 100.0 (84.6, 100.0)                  |
| Diarrheal diseases                 | 3 (13.6)             | 14 (63.6)            | 2 (9.1)               | 3 (13.6)              | 50.0 (11.8, 88.2)      | 87.5 (61.7, 98.4)      | 60.0 (14.7, 94.7)                    | 82.4 (56.6, 96.2)                    |
| HIV                                | 0 (0)                | 22 (100.0)           | 0 (0)                 | 0 (0)                 | --                     | 100.0 (84.6, 100.0)    | --                                   | 100.0 (84.6, 100.0)                  |
| Congenital birth defects           | 0 (0)                | 19 (86.4)            | 3 (13.6)              | 0 (0)                 | --                     | 86.4 (65.1, 97.1)      | 0.0 (0.0, 70.8)                      | 100.0 (82.4, 100.0)                  |
| Anemias                            | 2 (9.1)              | 18 (81.8)            | 2 (9.1)               | 0 (0)                 | 100.0 (15.8, 100.0)    | 90.0 (68.3, 98.8)      | 50.0 (6.8, 93.2)                     | 100.0 (81.5, 100.0)                  |
| Other respiratory disease*         | 1 (4.5)              | 21 (95.5)            | 0 (0)                 | 0 (0)                 | 100.0 (2.5, 100.0)     | 100.0 (83.9, 100.0)    | 100.0 (2.5, 100.0)                   | 100.0 (83.9, 100.0)                  |
| Meningitis/encephalitis            | 1 (4.5)              | 15 (68.2)            | 2 (9.1)               | 4 (18.2)              | 20.0 (0.5, 71.6)       | 88.2 (63.6, 98.5)      | 33.3 (0.8, 90.6)                     | 78.9 (54.4, 93.9)                    |
| Kenya, N=228                       |                      |                      |                       |                       |                        |                        |                                      |                                      |
| Lower respiratory tract infection  | 32 (14.0)            | 130 (57.0)           | 38 (16.7)             | 28 (12.3)             | 53.3 (40.0, 66.3)      | 77.4 (70.3, 83.5)      | 45.7 (33.7, 58.1)                    | 82.3 (75.4, 87.9)                    |
| Sepsis                             | 15 (6.6)             | 151 (66.2)           | 16 (7.0)              | 46 (20.2)             | 24.6 (14.5, 37.3)      | 90.4 (84.9, 94.4)      | 48.4 (30.2, 66.9)                    | 76.6 (70.1, 82.4)                    |
| Malnutrition                       | 33 (14.5)            | 140 (61.4)           | 18 (7.9)              | 37 (16.2)             | 47.1 (35.1, 59.4)      | 88.6 (82.6, 93.1)      | 64.7 (50.1, 77.6)                    | 79.1 (72.4, 84.8)                    |
| Malaria                            | 46 (20.2)            | 110 (48.2)           | 51 (22.4)             | 21 (9.2)              | 68.7 (56.2, 79.4)      | 68.3 (60.5, 75.4)      | 47.4 (37.2, 57.8)                    | 84.0 (76.5, 89.8)                    |
| Diarrheal diseases                 | 26 (11.4)            | 128 (56.1)           | 73 (32.0)             | 1 (0.4)               | 96.3 (81.0, 99.9)      | 63.7 (56.6, 70.3)      | 26.3 (17.9, 36.1)                    | 99.2 (95.8, 100.0)                   |
| HIV                                | 9 (3.9)              | 210 (92.1)           | 0 (0)                 | 9 (3.9)               | 50.0 (26.0, 74.0)      | 100.0 (98.3, 100.0)    | 100.0 (66.4, 100.0)                  | 95.9 (92.3, 98.1)                    |
| Congenital birth defects           | 7 (3.1)              | 209 (91.7)           | 5 (2.2)               | 7 (3.1)               | 50.0 (23.0, 77.0)      | 97.7 (94.6, 99.2)      | 58.3 (27.7, 84.8)                    | 96.8 (93.4, 98.7)                    |
| Anemias                            | 3 (1.3)              | 190 (83.3)           | 35 (15.4)             | 0 (0)                 | 100.0 (29.2, 100.0)    | 84.4 (79.0, 88.9)      | 7.9 (1.7, 21.4)                      | 100.0 (98.1, 100.0)                  |
| Other respiratory disease*         | 2 (0.9)              | 212 (93.0)           | 1 (0.4)               | 13 (5.7)              | 13.3 (1.7, 40.5)       | 99.5 (97.4, 100.0)     | 66.7 (9.4, 99.2)                     | 94.2 (90.3, 96.9)                    |
| Meningitis/encephalitis            | 0 (0)                | 217 (95.2)           | 10 (4.4)              | 1 (0.4)               | 0.0 (0.0, 97.5)        | 95.6 (92.0, 97.9)      | 0.0 (0.0, 30.8)                      | 99.5 (97.5, 100.0)                   |
| Mali, N=135                        |                      |                      |                       |                       |                        |                        |                                      |                                      |
| Lower respiratory tract infection  | 4 (3.0)              | 88 (65.2)            | 29 (21.5)             | 14 (10.4)             | 22.2 (6.4, 47.6)       | 75.2 (66.4, 82.7)      | 12.1 (3.4, 28.2)                     | 86.3 (78.0, 92.3)                    |
| Sepsis                             | 3 (2.2)              | 109 (80.7)           | 5 (3.7)               | 18 (13.3)             | 14.3 (3.0, 36.3)       | 95.6 (90.1, 98.6)      | 37.5 (8.5, 75.5)                     | 85.8 (78.5, 91.4)                    |
| Malnutrition                       | 3 (2.2)              | 113 (83.7)           | 11 (8.1)              | 8 (5.9)               | 27.3 (6.0, 61.0)       | 91.1 (84.7, 95.5)      | 21.4 (4.7, 50.8)                     | 93.4 (87.4, 97.1)                    |
| Malaria                            | 2 (1.5)              | 111 (82.2)           | 22 (16.3)             | 0 (0)                 | 100.0 (15.8, 100.0)    | 83.5 (76.0, 89.3)      | 8.3 (1.0, 27.0)                      | 100.0 (96.7, 100.0)                  |
| Diarrheal diseases                 | 4 (3.0)              | 102 (75.6)           | 27 (20.0)             | 2 (1.5)               | 66.7 (22.3, 95.7)      | 79.1 (71.0, 85.7)      | 12.9 (3.6, 29.8)                     | 98.1 (93.2, 99.8)                    |
| HIV                                | 0 (0)                | 131 (97.0)           | 0 (0)                 | 4 (3.0)               | 0.0 (0.0, 60.2)        | 100.0 (97.2, 100.0)    | --                                   | 97.0 (92.6, 99.2)                    |
| Congenital birth defects           | 2 (1.5)              | 120 (88.9)           | 10 (7.4)              | 3 (2.2)               | 40.0 (5.3, 85.3)       | 92.3 (86.3, 96.2)      | 16.7 (2.1, 48.4)                     | 97.6 (93.0, 99.5)                    |
| Anemias                            | 1 (0.7)              | 116 (85.9)           | 18 (13.3)             | 0 (0)                 | 100.0 (2.5, 100.0)     | 86.6 (79.6, 91.8)      | 5.3 (0.1, 26.0)                      | 100.0 (96.9, 100.0)                  |

|                                   |           |             |           |           |                     |                     |                   |                     |
|-----------------------------------|-----------|-------------|-----------|-----------|---------------------|---------------------|-------------------|---------------------|
| Other respiratory disease*        | 0 (0)     | 131 (97.0)  | 2 (1.5)   | 2 (1.5)   | 0.0 (0.0, 84.2)     | 98.5 (94.7, 99.8)   | 0.0 (0.0, 84.2)   | 98.5 (94.7, 99.8)   |
| Meningitis/encephalitis           | 1 (0.7)   | 117 (86.7)  | 15 (11.1) | 2 (1.5)   | 33.3 (0.8, 90.6)    | 88.6 (82.0, 93.5)   | 6.2 (0.2, 30.2)   | 98.3 (94.1, 99.8)   |
| Mozambique, N=88                  |           |             |           |           |                     |                     |                   |                     |
| Lower respiratory tract infection | 19 (21.6) | 43 (48.9)   | 9 (10.2)  | 17 (19.3) | 52.8 (35.5, 69.6)   | 82.7 (69.7, 91.8)   | 67.9 (47.6, 84.1) | 71.7 (58.6, 82.5)   |
| Sepsis                            | 7 (8.0)   | 53 (60.2)   | 11 (12.5) | 17 (19.3) | 29.2 (12.6, 51.1)   | 82.8 (71.3, 91.1)   | 38.9 (17.3, 64.3) | 75.7 (64.0, 85.2)   |
| Malnutrition                      | 4 (4.5)   | 42 (47.7)   | 41 (46.6) | 1 (1.1)   | 80.0 (28.4, 99.5)   | 50.6 (39.4, 61.8)   | 8.9 (2.5, 21.2)   | 97.7 (87.7, 99.9)   |
| Malaria                           | 17 (19.3) | 61 (69.3)   | 10 (11.4) | 0 (0)     | 100.0 (80.5, 100.0) | 85.9 (75.6, 93.0)   | 63.0 (42.4, 80.6) | 100.0 (94.1, 100.0) |
| Diarrheal diseases                | 16 (18.2) | 48 (54.5)   | 22 (25.0) | 2 (2.3)   | 88.9 (65.3, 98.6)   | 68.6 (56.4, 79.1)   | 42.1 (26.3, 59.2) | 96.0 (86.3, 99.5)   |
| HIV                               | 16 (18.2) | 66 (75.0)   | 3 (3.4)   | 3 (3.4)   | 84.2 (60.4, 96.6)   | 95.7 (87.8, 99.1)   | 84.2 (60.4, 96.6) | 95.7 (87.8, 99.1)   |
| Congenital birth defects          | 2 (2.3)   | 79 (89.8)   | 4 (4.5)   | 3 (3.4)   | 40.0 (5.3, 85.3)    | 95.2 (88.1, 98.7)   | 33.3 (4.3, 77.7)  | 96.3 (89.7, 99.2)   |
| Anemias                           | 4 (4.5)   | 63 (71.6)   | 20 (22.7) | 1 (1.1)   | 80.0 (28.4, 99.5)   | 75.9 (65.3, 84.6)   | 16.7 (4.7, 37.4)  | 98.4 (91.6, 100.0)  |
| Other respiratory disease*        | 3 (3.4)   | 69 (78.4)   | 11 (12.5) | 5 (5.7)   | 37.5 (8.5, 75.5)    | 86.2 (76.7, 92.9)   | 21.4 (4.7, 50.8)  | 93.2 (84.9, 97.8)   |
| Meningitis/encephalitis           | 1 (1.1)   | 85 (96.6)   | 2 (2.3)   | 0 (0)     | 100.0 (2.5, 100.0)  | 97.7 (91.9, 99.7)   | 33.3 (0.8, 90.6)  | 100.0 (95.8, 100.0) |
| Sierra Leone, N=215               |           |             |           |           |                     |                     |                   |                     |
| Lower respiratory tract infection | 18 (8.4)  | 130 (60.5)  | 43 (20.0) | 24 (11.2) | 42.9 (27.7, 59.0)   | 75.1 (68.0, 81.4)   | 29.5 (18.5, 42.6) | 84.4 (77.7, 89.8)   |
| Sepsis                            | 7 (3.3)   | 163 (75.8)  | 3 (1.4)   | 42 (19.5) | 14.3 (5.9, 27.2)    | 98.2 (94.8, 99.6)   | 70.0 (34.8, 93.3) | 79.5 (73.3, 84.8)   |
| Malnutrition                      | 22 (10.2) | 131 (60.9)  | 23 (10.7) | 39 (18.1) | 36.1 (24.2, 49.4)   | 85.1 (78.4, 90.3)   | 48.9 (33.7, 64.2) | 77.1 (70.0, 83.1)   |
| Malaria                           | 49 (22.8) | 75 (34.9)   | 84 (39.1) | 7 (3.3)   | 87.5 (75.9, 94.8)   | 47.2 (39.2, 55.2)   | 36.8 (28.6, 45.6) | 91.5 (83.2, 96.5)   |
| Diarrheal diseases                | 10 (4.7)  | 157 (73.0)  | 42 (19.5) | 6 (2.8)   | 62.5 (35.4, 84.8)   | 78.9 (72.6, 84.3)   | 19.2 (9.6, 32.5)  | 96.3 (92.2, 98.6)   |
| HIV                               | 3 (1.4)   | 206 (95.8)  | 2 (0.9)   | 4 (1.9)   | 42.9 (9.9, 81.6)    | 99.0 (96.6, 99.9)   | 60.0 (14.7, 94.7) | 98.1 (95.2, 99.5)   |
| Congenital birth defects          | 0 (0)     | 215 (100.0) | 0 (0)     | 0 (0)     | --                  | 100.0 (98.3, 100.0) | --                | 100.0 (98.3, 100.0) |
| Anemias                           | 24 (11.2) | 99 (46.0)   | 35 (16.3) | 57 (26.5) | 29.6 (20.0, 40.8)   | 73.9 (65.6, 81.1)   | 40.7 (28.1, 54.3) | 63.5 (55.4, 71.0)   |
| Other respiratory disease*        | 0 (0)     | 200 (93.0)  | 7 (3.3)   | 8 (3.7)   | 0.0 (0.0, 36.9)     | 96.6 (93.2, 98.6)   | 0.0 (0.0, 41.0)   | 96.2 (92.6, 98.3)   |
| Meningitis/encephalitis           | 2 (0.9)   | 201 (93.5)  | 6 (2.8)   | 6 (2.8)   | 25.0 (3.2, 65.1)    | 97.1 (93.8, 98.9)   | 25.0 (3.2, 65.1)  | 97.1 (93.8, 98.9)   |
| South Africa, N=164               |           |             |           |           |                     |                     |                   |                     |
| Lower respiratory tract infection | 53 (32.3) | 41 (25.0)   | 13 (7.9)  | 57 (34.8) | 48.2 (38.6, 57.9)   | 75.9 (62.4, 86.5)   | 80.3 (68.7, 89.1) | 41.8 (31.9, 52.2)   |
| Sepsis                            | 60 (36.6) | 48 (29.3)   | 26 (15.9) | 30 (18.3) | 66.7 (55.9, 76.3)   | 64.9 (52.9, 75.6)   | 69.8 (58.9, 79.2) | 61.5 (49.8, 72.3)   |
| Malnutrition                      | 6 (3.7)   | 131 (79.9)  | 25 (15.2) | 2 (1.2)   | 75.0 (34.9, 96.8)   | 84.0 (77.3, 89.4)   | 19.4 (7.5, 37.5)  | 98.5 (94.7, 99.8)   |
| Malaria                           | 0 (0)     | 164 (100.0) | 0 (0)     | 0 (0)     | --                  | 100.0 (97.8, 100.0) | --                | 100.0 (97.8, 100.0) |
| Diarrheal diseases                | 14 (8.5)  | 121 (73.8)  | 27 (16.5) | 2 (1.2)   | 87.5 (61.7, 98.4)   | 81.8 (74.6, 87.6)   | 34.1 (20.1, 50.6) | 98.4 (94.2, 99.8)   |
| HIV                               | 17 (10.4) | 141 (86.0)  | 3 (1.8)   | 3 (1.8)   | 85.0 (62.1, 96.8)   | 97.9 (94.0, 99.6)   | 85.0 (62.1, 96.8) | 97.9 (94.0, 99.6)   |
| Congenital birth defects          | 24 (14.6) | 115 (70.1)  | 11 (6.7)  | 14 (8.5)  | 63.2 (46.0, 78.2)   | 91.3 (84.9, 95.6)   | 68.6 (50.7, 83.1) | 89.1 (82.5, 93.9)   |
| Anemias                           | 0 (0)     | 140 (85.4)  | 24 (14.6) | 0 (0)     | --                  | 85.4 (79.0, 90.4)   | 0.0 (0.0, 14.2)   | 100.0 (97.4, 100.0) |
| Other respiratory disease*        | 7 (4.3)   | 135 (82.3)  | 13 (7.9)  | 9 (5.5)   | 43.8 (19.8, 70.1)   | 91.2 (85.4, 95.2)   | 35.0 (15.4, 59.2) | 93.8 (88.5, 97.1)   |
| Meningitis/encephalitis           | 9 (5.5)   | 114 (69.5)  | 19 (11.6) | 22 (13.4) | 29.0 (14.2, 48.0)   | 85.7 (78.6, 91.2)   | 32.1 (15.9, 52.4) | 83.8 (76.5, 89.6)   |

\*Includes aspiration pneumonia, interstitial lung disease, and pulmonary hemorrhage

**Supplemental Table 6.** Comparison of clinician antemortem diagnosis and postmortem causes of death among infants and children aged 1-59 months who died from 2016 to 2022 by sex

| Disease                           | True Positive, n (%) | True Negative, n (%) | False Positive, n (%) | False Negative, n (%) | Sensitivity % (95% CI) | Specificity % (95% CI) | Positive Predictive Value % (95% CI) | Negative Predictive Value % (95% CI) |
|-----------------------------------|----------------------|----------------------|-----------------------|-----------------------|------------------------|------------------------|--------------------------------------|--------------------------------------|
| Females, N=417                    |                      |                      |                       |                       |                        |                        |                                      |                                      |
| Lower respiratory tract infection | 64 (15.3)            | 222 (53.2)           | 69 (16.5)             | 62 (14.9)             | 50.8 (41.7, 59.8)      | 76.3 (71.0, 81.1)      | 48.1 (39.4, 56.9)                    | 78.2 (72.9, 82.8)                    |
| Sepsis                            | 44 (10.6)            | 261 (62.6)           | 31 (7.4)              | 81 (19.4)             | 35.2 (26.9, 44.2)      | 89.4 (85.3, 92.7)      | 58.7 (46.7, 69.9)                    | 76.3 (71.4, 80.7)                    |
| Malnutrition                      | 37 (8.9)             | 292 (70.0)           | 50 (12.0)             | 38 (9.1)              | 49.3 (37.6, 61.1)      | 85.4 (81.2, 89.0)      | 42.5 (32.0, 53.6)                    | 88.5 (84.5, 91.7)                    |
| Malaria                           | 57 (13.7)            | 277 (66.4)           | 70 (16.8)             | 13 (3.1)              | 81.4 (70.3, 89.7)      | 79.8 (75.2, 83.9)      | 44.9 (36.1, 54.0)                    | 95.5 (92.5, 97.6)                    |
| Diarrheal diseases                | 41 (9.8)             | 273 (65.5)           | 99 (23.7)             | 4 (1.0)               | 91.1 (78.8, 97.5)      | 73.4 (68.6, 77.8)      | 29.3 (21.9, 37.6)                    | 98.6 (96.3, 99.6)                    |
| HIV                               | 21 (5.0)             | 377 (90.4)           | 4 (1.0)               | 15 (3.6)              | 58.3 (40.8, 74.5)      | 99.0 (97.3, 99.7)      | 84.0 (63.9, 95.5)                    | 96.2 (93.8, 97.8)                    |
| Congenital birth defects          | 17 (4.1)             | 361 (86.6)           | 26 (6.2)              | 13 (3.1)              | 56.7 (37.4, 74.5)      | 93.3 (90.3, 95.6)      | 39.5 (25.0, 55.6)                    | 96.5 (94.1, 98.1)                    |
| Anemias                           | 15 (3.6)             | 299 (71.7)           | 69 (16.5)             | 34 (8.2)              | 30.6 (18.3, 45.4)      | 81.2 (76.9, 85.1)      | 17.9 (10.4, 27.7)                    | 89.8 (86.0, 92.8)                    |
| Other respiratory disease*        | 3 (0.7)              | 378 (90.6)           | 17 (4.1)              | 19 (4.6)              | 13.6 (2.9, 34.9)       | 95.7 (93.2, 97.5)      | 15.0 (3.2, 37.9)                     | 95.2 (92.6, 97.1)                    |
| Meningitis/encephalitis           | 2 (0.5)              | 373 (89.4)           | 28 (6.7)              | 14 (3.4)              | 12.5 (1.6, 38.3)       | 93.0 (90.1, 95.3)      | 6.7 (0.8, 22.1)                      | 96.4 (94.0, 98.0)                    |
| Males, N=464                      |                      |                      |                       |                       |                        |                        |                                      |                                      |
| Lower respiratory tract infection | 66 (14.2)            | 244 (52.6)           | 72 (15.5)             | 82 (17.7)             | 44.6 (36.4, 53.0)      | 77.2 (72.2, 81.7)      | 47.8 (39.3, 56.5)                    | 74.8 (69.8, 79.5)                    |
| Sepsis                            | 52 (11.2)            | 299 (64.4)           | 32 (6.9)              | 81 (17.5)             | 39.1 (30.8, 47.9)      | 90.3 (86.6, 93.3)      | 61.9 (50.7, 72.3)                    | 78.7 (74.2, 82.7)                    |
| Malnutrition                      | 40 (8.6)             | 300 (64.7)           | 72 (15.5)             | 52 (11.2)             | 43.5 (33.2, 54.2)      | 80.6 (76.3, 84.5)      | 35.7 (26.9, 45.3)                    | 85.2 (81.1, 88.8)                    |
| Malaria                           | 57 (12.3)            | 295 (63.6)           | 97 (20.9)             | 15 (3.2)              | 79.2 (68.0, 87.8)      | 75.3 (70.7, 79.4)      | 37.0 (29.4, 45.2)                    | 95.2 (92.1, 97.3)                    |
| Diarrheal diseases                | 33 (7.1)             | 322 (69.4)           | 97 (20.9)             | 12 (2.6)              | 73.3 (58.1, 85.4)      | 76.8 (72.5, 80.8)      | 25.4 (18.2, 33.8)                    | 96.4 (93.8, 98.1)                    |
| HIV                               | 24 (5.2)             | 428 (92.2)           | 4 (0.9)               | 8 (1.7)               | 75.0 (56.6, 88.5)      | 99.1 (97.6, 99.7)      | 85.7 (67.3, 96.0)                    | 98.2 (96.4, 99.2)                    |
| Congenital birth defects          | 18 (3.9)             | 411 (88.6)           | 20 (4.3)              | 15 (3.2)              | 54.5 (36.4, 71.9)      | 95.4 (92.9, 97.1)      | 47.4 (31.0, 64.2)                    | 96.5 (94.3, 98.0)                    |
| Anemias                           | 19 (4.1)             | 353 (76.1)           | 67 (14.4)             | 25 (5.4)              | 43.2 (28.3, 59.0)      | 84.0 (80.2, 87.4)      | 22.1 (13.9, 32.3)                    | 93.4 (90.4, 95.7)                    |
| Other respiratory disease*        | 10 (2.2)             | 419 (90.3)           | 17 (3.7)              | 18 (3.9)              | 35.7 (18.6, 55.9)      | 96.1 (93.8, 97.7)      | 37.0 (19.4, 57.6)                    | 95.9 (93.6, 97.5)                    |
| Meningitis/encephalitis           | 12 (2.6)             | 405 (87.3)           | 26 (5.6)              | 21 (4.5)              | 36.4 (20.4, 54.9)      | 94.0 (91.3, 96.0)      | 31.6 (17.5, 48.7)                    | 95.1 (92.6, 96.9)                    |

\*Includes aspiration pneumonia, interstitial lung disease, and pulmonary hemorrhage



**Supplemental Table 7.** Comparison of clinician antemortem diagnosis and postmortem causes of death among infants and children aged 1-59 months who died from 2016 to 2022 by age

| Disease                           | True Positive, n (%) | True Negative, n (%) | False Positive, n (%) | False Negative, n (%) | Sensitivity % (95% CI) | Specificity % (95% CI) | Positive Predictive Value % (95% CI) | Negative Predictive Value % (95% CI) |
|-----------------------------------|----------------------|----------------------|-----------------------|-----------------------|------------------------|------------------------|--------------------------------------|--------------------------------------|
| Infants aged 1-11 months, N=465   |                      |                      |                       |                       |                        |                        |                                      |                                      |
| Lower respiratory tract infection | 78 (16.8)            | 227 (48.8)           | 81 (17.4)             | 79 (17.0)             | 49.7 (41.6, 57.8)      | 73.7 (68.4, 78.5)      | 49.1 (41.1, 57.1)                    | 74.2 (68.9, 79.0)                    |
| Sepsis                            | 71 (15.3)            | 276 (59.4)           | 40 (8.6)              | 78 (16.8)             | 47.7 (39.4, 56.0)      | 87.3 (83.2, 90.8)      | 64.0 (54.3, 72.9)                    | 78.0 (73.3, 82.2)                    |
| Malnutrition                      | 38 (8.2)             | 332 (71.4)           | 52 (11.2)             | 43 (9.2)              | 46.9 (35.7, 58.3)      | 86.5 (82.6, 89.7)      | 42.2 (31.9, 53.1)                    | 88.5 (84.9, 91.6)                    |
| Malaria                           | 35 (7.5)             | 359 (77.2)           | 62 (13.3)             | 9 (1.9)               | 79.5 (64.7, 90.2)      | 85.3 (81.5, 88.5)      | 36.1 (26.6, 46.5)                    | 97.6 (95.4, 98.9)                    |
| Diarrheal diseases                | 44 (9.5)             | 315 (67.7)           | 102 (21.9)            | 4 (0.9)               | 91.7 (80.0, 97.7)      | 75.5 (71.1, 79.6)      | 30.1 (22.8, 38.3)                    | 98.7 (96.8, 99.7)                    |
| HIV                               | 18 (3.9)             | 429 (92.3)           | 6 (1.3)               | 12 (2.6)              | 60.0 (40.6, 77.3)      | 98.6 (97.0, 99.5)      | 75.0 (53.3, 90.2)                    | 97.3 (95.3, 98.6)                    |
| Congenital birth defects          | 26 (5.6)             | 383 (82.4)           | 37 (8.0)              | 19 (4.1)              | 57.8 (42.2, 72.3)      | 91.2 (88.1, 93.7)      | 41.3 (29.0, 54.4)                    | 95.3 (92.7, 97.1)                    |
| Anemias                           | 8 (1.7)              | 375 (80.6)           | 64 (13.8)             | 18 (3.9)              | 30.8 (14.3, 51.8)      | 85.4 (81.8, 88.6)      | 11.1 (4.9, 20.7)                     | 95.4 (92.9, 97.3)                    |
| Other respiratory disease*        | 5 (1.1)              | 424 (91.2)           | 20 (4.3)              | 16 (3.4)              | 23.8 (8.2, 47.2)       | 95.5 (93.1, 97.2)      | 20.0 (6.8, 40.7)                     | 96.4 (94.2, 97.9)                    |
| Meningitis/encephalitis           | 12 (2.6)             | 399 (85.8)           | 33 (7.1)              | 21 (4.5)              | 36.4 (20.4, 54.9)      | 92.4 (89.4, 94.7)      | 26.7 (14.6, 41.9)                    | 95.0 (92.5, 96.9)                    |
| Children aged 12-59 months, N=464 |                      |                      |                       |                       |                        |                        |                                      |                                      |
| Lower respiratory tract infection | 52 (12.5)            | 239 (57.5)           | 60 (14.4)             | 65 (15.6)             | 44.4 (35.3, 53.9)      | 79.9 (74.9, 84.3)      | 46.4 (37.0, 56.1)                    | 78.6 (73.6, 83.1)                    |
| Sepsis                            | 25 (6.0)             | 284 (68.3)           | 23 (5.5)              | 84 (20.2)             | 22.9 (15.4, 32.0)      | 92.5 (89.0, 95.2)      | 52.1 (37.2, 66.7)                    | 77.2 (72.5, 81.4)                    |
| Malnutrition                      | 39 (9.4)             | 260 (62.5)           | 70 (16.8)             | 47 (11.3)             | 45.3 (34.6, 56.5)      | 78.8 (74.0, 83.1)      | 35.8 (26.8, 45.5)                    | 84.7 (80.2, 88.5)                    |
| Malaria                           | 79 (19.0)            | 213 (51.2)           | 105 (25.2)            | 19 (4.6)              | 80.6 (71.4, 87.9)      | 67.0 (61.5, 72.1)      | 42.9 (35.7, 50.4)                    | 91.8 (87.5, 95.0)                    |
| Diarrheal diseases                | 30 (7.2)             | 280 (67.3)           | 94 (22.6)             | 12 (2.9)              | 71.4 (55.4, 84.3)      | 74.9 (70.1, 79.2)      | 24.2 (17.0, 32.7)                    | 95.9 (92.9, 97.9)                    |
| HIV                               | 27 (6.5)             | 376 (90.4)           | 2 (0.5)               | 11 (2.6)              | 71.1 (54.1, 84.6)      | 99.5 (98.1, 99.9)      | 93.1 (77.2, 99.2)                    | 97.2 (95.0, 98.6)                    |
| Congenital birth defects          | 9 (2.2)              | 389 (93.5)           | 9 (2.2)               | 9 (2.2)               | 50.0 (26.0, 74.0)      | 97.7 (95.8, 99.0)      | 50.0 (26.0, 74.0)                    | 97.7 (95.8, 99.0)                    |
| Anemias                           | 26 (6.2)             | 277 (66.6)           | 72 (17.3)             | 41 (9.9)              | 38.8 (27.1, 51.5)      | 79.4 (74.7, 83.5)      | 26.5 (18.1, 36.4)                    | 87.1 (82.9, 90.6)                    |
| Other respiratory disease*        | 8 (1.9)              | 373 (89.7)           | 14 (3.4)              | 21 (5.0)              | 27.6 (12.7, 47.2)      | 96.4 (94.0, 98.0)      | 36.4 (17.2, 59.3)                    | 94.7 (92.0, 96.7)                    |
| Meningitis/encephalitis           | 2 (0.5)              | 379 (91.1)           | 21 (5.0)              | 14 (3.4)              | 12.5 (1.6, 38.3)       | 94.8 (92.1, 96.7)      | 8.7 (1.1, 28.0)                      | 96.4 (94.1, 98.0)                    |

\*Includes aspiration pneumonia, interstitial lung disease, and pulmonary hemorrhage

**Supplemental Table 8.** Comparison of clinician antemortem diagnosis and postmortem causes of death among infants and children aged 1-59 months who died from 2016 to 2022 by hospital admission duration

| Disease                                          | True Positive, n (%) | True Negative, n (%) | False Positive, n (%) | False Negative, n (%) | Sensitivity % (95% CI) | Specificity % (95% CI) | Positive Predictive Value % (95% CI) | Negative Predictive Value % (95% CI) |
|--------------------------------------------------|----------------------|----------------------|-----------------------|-----------------------|------------------------|------------------------|--------------------------------------|--------------------------------------|
| <24 hours hospital admission before death, N=500 |                      |                      |                       |                       |                        |                        |                                      |                                      |
| Lower respiratory tract infection                | 44 (8.8)             | 305 (61.0)           | 80 (16.0)             | 71 (14.2)             | 38.3 (29.4, 47.8)      | 79.2 (74.8, 83.2)      | 35.5 (27.1, 44.6)                    | 81.1 (76.8, 84.9)                    |
| Sepsis                                           | 19 (3.8)             | 365 (73.0)           | 25 (5.0)              | 91 (18.2)             | 17.3 (10.7, 25.7)      | 93.6 (90.7, 95.8)      | 43.2 (28.3, 59.0)                    | 80.0 (76.1, 83.6)                    |
| Malnutrition                                     | 34 (6.8)             | 368 (73.6)           | 39 (7.8)              | 59 (11.8)             | 36.6 (26.8, 47.2)      | 90.4 (87.1, 93.1)      | 46.6 (34.8, 58.6)                    | 86.2 (82.5, 89.3)                    |
| Malaria                                          | 75 (15.0)            | 294 (58.8)           | 110 (22.0)            | 21 (4.2)              | 78.1 (68.5, 85.9)      | 72.8 (68.2, 77.1)      | 40.5 (33.4, 48.0)                    | 93.3 (90.0, 95.8)                    |
| Diarrheal diseases                               | 43 (8.6)             | 352 (70.4)           | 98 (19.6)             | 7 (1.4)               | 86.0 (73.3, 94.2)      | 78.2 (74.1, 82.0)      | 30.5 (23.0, 38.8)                    | 98.1 (96.0, 99.2)                    |
| HIV                                              | 10 (2.0)             | 475 (95.0)           | 2 (0.4)               | 13 (2.6)              | 43.5 (23.2, 65.5)      | 99.6 (98.5, 99.9)      | 83.3 (51.6, 97.9)                    | 97.3 (95.5, 98.6)                    |
| Congenital birth defects                         | 10 (2.0)             | 457 (91.4)           | 22 (4.4)              | 11 (2.2)              | 47.6 (25.7, 70.2)      | 95.4 (93.1, 97.1)      | 31.2 (16.1, 50.0)                    | 97.6 (95.8, 98.8)                    |
| Anemias                                          | 22 (4.4)             | 377 (75.4)           | 75 (15.0)             | 26 (5.2)              | 45.8 (31.4, 60.8)      | 83.4 (79.7, 86.7)      | 22.7 (14.8, 32.3)                    | 93.5 (90.7, 95.7)                    |
| Other respiratory disease*                       | 2 (0.4)              | 464 (92.8)           | 10 (2.0)              | 24 (4.8)              | 7.7 (0.9, 25.1)        | 97.9 (96.2, 99.0)      | 16.7 (2.1, 48.4)                     | 95.1 (92.8, 96.8)                    |
| Meningitis/encephalitis                          | 6 (1.2)              | 461 (92.2)           | 23 (4.6)              | 10 (2.0)              | 37.5 (15.2, 64.6)      | 95.2 (93.0, 97.0)      | 20.7 (8.0, 39.7)                     | 97.9 (96.1, 99.0)                    |
| ≥24 hours hospital admission before death, N=381 |                      |                      |                       |                       |                        |                        |                                      |                                      |
| Lower respiratory tract infection                | 86 (22.6)            | 161 (42.3)           | 61 (16.0)             | 73 (19.2)             | 54.1 (46.0, 62.0)      | 72.5 (66.1, 78.3)      | 58.5 (50.1, 66.6)                    | 68.8 (62.4, 74.7)                    |
| Sepsis                                           | 77 (20.2)            | 195 (51.2)           | 38 (10.0)             | 71 (18.6)             | 52.0 (43.7, 60.3)      | 83.7 (78.3, 88.2)      | 67.0 (57.6, 75.4)                    | 73.3 (67.6, 78.5)                    |
| Malnutrition                                     | 43 (11.3)            | 224 (58.8)           | 83 (21.8)             | 31 (8.1)              | 58.1 (46.1, 69.5)      | 73.0 (67.6, 77.9)      | 34.1 (25.9, 43.1)                    | 87.8 (83.2, 91.6)                    |
| Malaria                                          | 39 (10.2)            | 278 (73.0)           | 57 (15.0)             | 7 (1.8)               | 84.8 (71.1, 93.7)      | 83.0 (78.5, 86.9)      | 40.6 (30.7, 51.1)                    | 97.5 (95.0, 99.0)                    |
| Diarrheal diseases                               | 31 (8.1)             | 243 (63.8)           | 98 (25.7)             | 9 (2.4)               | 77.5 (61.5, 89.2)      | 71.3 (66.1, 76.0)      | 24.0 (16.9, 32.3)                    | 96.4 (93.3, 98.4)                    |
| HIV                                              | 35 (9.2)             | 330 (86.6)           | 6 (1.6)               | 10 (2.6)              | 77.8 (62.9, 88.8)      | 98.2 (96.2, 99.3)      | 85.4 (70.8, 94.4)                    | 97.1 (94.7, 98.6)                    |
| Congenital birth defects                         | 25 (6.6)             | 315 (82.7)           | 24 (6.3)              | 17 (4.5)              | 59.5 (43.3, 74.4)      | 92.9 (89.6, 95.4)      | 51.0 (36.3, 65.6)                    | 94.9 (91.9, 97.0)                    |
| Anemias                                          | 12 (3.1)             | 275 (72.2)           | 61 (16.0)             | 33 (8.7)              | 26.7 (14.6, 41.9)      | 81.8 (77.3, 85.8)      | 16.4 (8.8, 27.0)                     | 89.3 (85.3, 92.5)                    |
| Other respiratory disease*                       | 11 (2.9)             | 333 (87.4)           | 24 (6.3)              | 13 (3.4)              | 45.8 (25.6, 67.2)      | 93.3 (90.2, 95.6)      | 31.4 (16.9, 49.3)                    | 96.2 (93.7, 98.0)                    |
| Meningitis/encephalitis                          | 8 (2.1)              | 317 (83.2)           | 31 (8.1)              | 25 (6.6)              | 24.2 (11.1, 42.3)      | 91.1 (87.6, 93.9)      | 20.5 (9.3, 36.5)                     | 92.7 (89.4, 95.2)                    |

\*Includes aspiration pneumonia, interstitial lung disease, and pulmonary hemorrhage

**Supplemental Table 9.** Comparison of clinician antemortem diagnosis and postmortem causes of death among infants and children aged 1-59 months who died from 2016 to 2022 by number of causes of death

| Disease                             | True Positive, n (%) | True Negative, n (%) | False Positive, n (%) | False Negative, n (%) | Sensitivity % (95% CI) | Specificity % (95% CI) | Positive Predictive Value % (95% CI) | Negative Predictive Value % (95% CI) |
|-------------------------------------|----------------------|----------------------|-----------------------|-----------------------|------------------------|------------------------|--------------------------------------|--------------------------------------|
| One cause of death, N=115           |                      |                      |                       |                       |                        |                        |                                      |                                      |
| Lower respiratory tract infection   | 16 (13.9)            | 75 (65.2)            | 18 (15.7)             | 6 (5.2)               | 72.7 (49.8, 89.3)      | 80.6 (71.1, 88.1)      | 47.1 (29.8, 64.9)                    | 92.6 (84.6, 97.2)                    |
| Sepsis                              | 0 (0)                | 93 (80.9)            | 13 (11.3)             | 9 (7.8)               | 0.0 (0.0, 33.6)        | 87.7 (79.9, 93.3)      | 0.0 (0.0, 24.7)                      | 91.2 (83.9, 95.9)                    |
| Malnutrition                        | 3 (2.6)              | 100 (87.0)           | 12 (10.4)             | 0 (0)                 | 100.0 (29.2, 100.0)    | 89.3 (82.0, 94.3)      | 20.0 (4.3, 48.1)                     | 100.0 (96.4, 100.0)                  |
| Malaria                             | 38 (33.0)            | 56 (48.7)            | 16 (13.9)             | 5 (4.3)               | 88.4 (74.9, 96.1)      | 77.8 (66.4, 86.7)      | 70.4 (56.4, 82.0)                    | 91.8 (81.9, 97.3)                    |
| Diarrheal diseases                  | 16 (13.9)            | 73 (63.5)            | 25 (21.7)             | 1 (0.9)               | 94.1 (71.3, 99.9)      | 74.5 (64.7, 82.8)      | 39.0 (24.2, 55.5)                    | 98.6 (92.7, 100.0)                   |
| HIV                                 | 0 (0)                | 114 (99.1)           | 0 (0)                 | 1 (0.9)               | 0.0 (0.0, 97.5)        | 100.0 (96.8, 100.0)    | --                                   | 99.1 (95.3, 100.0)                   |
| Congenital birth defects            | 1 (0.9)              | 112 (97.4)           | 1 (0.9)               | 1 (0.9)               | 50.0 (1.3, 98.7)       | 99.1 (95.2, 100.0)     | 50.0 (1.3, 98.7)                     | 99.1 (95.2, 100.0)                   |
| Anemias                             | 0 (0)                | 95 (82.6)            | 20 (17.4)             | 0 (0)                 | --                     | 82.6 (74.4, 89.0)      | 0.0 (0.0, 16.8)                      | 100.0 (96.2, 100.0)                  |
| Other respiratory disease*          | 2 (1.7)              | 104 (90.4)           | 6 (5.2)               | 3 (2.6)               | 40.0 (5.3, 85.3)       | 94.5 (88.5, 98.0)      | 25.0 (3.2, 65.1)                     | 97.2 (92.0, 99.4)                    |
| Meningitis/encephalitis             | 0 (0)                | 108 (93.9)           | 7 (6.1)               | 0 (0)                 | --                     | 93.9 (87.9, 97.5)      | 0.0 (0.0, 41.0)                      | 100.0 (96.6, 100.0)                  |
| More than one cause of death, N=470 |                      |                      |                       |                       |                        |                        |                                      |                                      |
| Lower respiratory tract infection   | 114 (24.3)           | 172 (36.6)           | 46 (9.8)              | 138 (29.4)            | 45.2 (39.0, 51.6)      | 78.9 (72.9, 84.1)      | 71.2 (63.6, 78.1)                    | 55.5 (49.8, 61.1)                    |
| Sepsis                              | 96 (20.4)            | 187 (39.8)           | 34 (7.2)              | 153 (32.6)            | 38.6 (32.5, 44.9)      | 84.6 (79.2, 89.1)      | 73.8 (65.4, 81.2)                    | 55.0 (49.5, 60.4)                    |
| Malnutrition                        | 74 (15.7)            | 238 (50.6)           | 68 (14.5)             | 90 (19.1)             | 45.1 (37.4, 53.1)      | 77.8 (72.7, 82.3)      | 52.1 (43.6, 60.6)                    | 72.6 (67.4, 77.3)                    |
| Malaria                             | 76 (16.2)            | 321 (68.3)           | 50 (10.6)             | 23 (4.9)              | 76.8 (67.2, 84.7)      | 86.5 (82.6, 89.8)      | 60.3 (51.2, 68.9)                    | 93.3 (90.1, 95.7)                    |
| Diarrheal diseases                  | 58 (12.3)            | 302 (64.3)           | 95 (20.2)             | 15 (3.2)              | 79.5 (68.4, 88.0)      | 76.1 (71.6, 80.2)      | 37.9 (30.2, 46.1)                    | 95.3 (92.3, 97.3)                    |
| HIV                                 | 45 (9.6)             | 397 (84.5)           | 6 (1.3)               | 22 (4.7)              | 67.2 (54.6, 78.2)      | 98.5 (96.8, 99.5)      | 88.2 (76.1, 95.6)                    | 94.7 (92.2, 96.7)                    |
| Congenital birth defects            | 34 (7.2)             | 395 (84.0)           | 14 (3.0)              | 27 (5.7)              | 55.7 (42.4, 68.5)      | 96.6 (94.3, 98.1)      | 70.8 (55.9, 83.0)                    | 93.6 (90.8, 95.7)                    |
| Anemias                             | 34 (7.2)             | 319 (67.9)           | 58 (12.3)             | 59 (12.6)             | 36.6 (26.8, 47.2)      | 84.6 (80.6, 88.1)      | 37.0 (27.1, 47.7)                    | 84.4 (80.3, 87.9)                    |
| Other respiratory disease*          | 11 (2.3)             | 403 (85.7)           | 22 (4.7)              | 34 (7.2)              | 24.4 (12.9, 39.5)      | 94.8 (92.3, 96.7)      | 33.3 (18.0, 51.8)                    | 92.2 (89.3, 94.6)                    |
| Meningitis/encephalitis             | 14 (3.0)             | 394 (83.8)           | 27 (5.7)              | 35 (7.4)              | 28.6 (16.6, 43.3)      | 93.6 (90.8, 95.7)      | 34.1 (20.1, 50.6)                    | 91.8 (88.8, 94.3)                    |

\*Includes aspiration pneumonia, interstitial lung disease, and pulmonary hemorrhage

**Supplemental Table 10.** Comparison of clinician antemortem diagnosis and postmortem causes of death among infants and children aged 1-59 months who died at home following clinical encounters from 2016 to 2022

|                                   | <b>True Positive, n (%)</b> | <b>True Negative, n (%)</b> | <b>False Positive, n (%)</b> | <b>False Negative, n (%)</b> | <b>Sensitivity % (95% CI)</b> | <b>Specificity % (95% CI)</b> | <b>Positive Predictive Value % (95% CI)</b> | <b>Negative Predictive Value % (95% CI)</b> |
|-----------------------------------|-----------------------------|-----------------------------|------------------------------|------------------------------|-------------------------------|-------------------------------|---------------------------------------------|---------------------------------------------|
| Lower respiratory tract infection | 14 (6.2)                    | 147 (65.6)                  | 34 (15.2)                    | 29 (12.9)                    | 32.6 (19.1, 48.5)             | 81.2 (74.8, 86.6)             | 29.2 (17.0, 44.1)                           | 83.5 (77.2, 88.7)                           |
| Sepsis                            | 4 (1.8)                     | 170 (75.9)                  | 9 (4.0)                      | 41 (18.3)                    | 8.9 (2.5, 21.2)               | 95.0 (90.7, 97.7)             | 30.8 (9.1, 61.4)                            | 80.6 (74.6, 85.7)                           |
| Malnutrition                      | 14 (6.2)                    | 163 (72.8)                  | 17 (7.6)                     | 30 (13.4)                    | 31.8 (18.6, 47.6)             | 90.6 (85.3, 94.4)             | 45.2 (27.3, 64.0)                           | 84.5 (78.6, 89.3)                           |
| Malaria                           | 21 (9.4)                    | 158 (70.5)                  | 33 (14.7)                    | 12 (5.4)                     | 63.6 (45.1, 79.6)             | 82.7 (76.6, 87.8)             | 38.9 (25.9, 53.1)                           | 92.9 (88.0, 96.3)                           |
| Diarrheal diseases                | 11 (4.9)                    | 169 (75.4)                  | 42 (18.8)                    | 2 (0.9)                      | 84.6 (54.6, 98.1)             | 80.1 (74.1, 85.3)             | 20.8 (10.8, 34.1)                           | 98.8 (95.8, 99.9)                           |
| HIV                               | 1 (0.4)                     | 213 (95.1)                  | 1 (0.4)                      | 9 (4.0)                      | 10.0 (0.3, 44.5)              | 99.5 (97.4, 100.0)            | 50.0 (1.3, 98.7)                            | 95.9 (92.4, 98.1)                           |
| Congenital birth defects          | 4 (1.8)                     | 201 (89.7)                  | 16 (7.1)                     | 3 (1.3)                      | 57.1 (18.4, 90.1)             | 92.6 (88.3, 95.7)             | 20.0 (5.7, 43.7)                            | 98.5 (95.8, 99.7)                           |
| Anemias                           | 2 (0.9)                     | 199 (88.8)                  | 23 (10.3)                    | 0 (0)                        | 100.0 (15.8, 100.0)           | 89.6 (84.9, 93.3)             | 8.0 (1.0, 26.0)                             | 100.0 (98.2, 100.0)                         |
| Other respiratory diseases*       | 3 (1.3)                     | 212 (94.6)                  | 3 (1.3)                      | 6 (2.7)                      | 33.3 (7.5, 70.1)              | 98.6 (96.0, 99.7)             | 50.0 (11.8, 88.2)                           | 97.2 (94.1, 99.0)                           |
| Meningitis/encephalitis           | 1 (0.4)                     | 211 (94.2)                  | 7 (3.1)                      | 5 (2.2)                      | 16.7 (0.4, 64.1)              | 96.8 (93.5, 98.7)             | 12.5 (0.3, 52.7)                            | 97.7 (94.7, 99.2)                           |

\*Includes aspiration pneumonia, interstitial lung disease, and pulmonary hemorrhage
